# Supplementary material for: No evidence of abnormal metabolic or inflammatory activity in the brains of patients with rheumatoid arthritis: results from a preliminary study using whole-brain magnetic resonance spectroscopic imaging (MRSI)
Source: PubMed Central journal article supplement (PMC7237391; doi:10.1007/s10067-019-04923-5), 2020-01-30
Supplement: 10067_2019_4923_MOESM1_ESM.pdf [file 10067_2019_4923_MOESM1_ESM.pdf]

## **Clinical Rheumatology**

No evidence of abnormal metabolic or inflammatory activity in the brains of patients with rheumatoid arthritis: examination via whole-brain magnetic resonance spectroscopic imaging (MRSI).

Christina Mueller, M.S., Joanne C. Lin, Ph.D., Halle H. Thannickal, Altamish Daredia, B.S., Thomas S. Denney, Ph.D., Ronald Beyers, Ph.D., Jarred W. Younger, Ph.D.

\*Jarred W. Younger (corresponding author)

Department of Psychology, University of Alabama at Birmingham

Campbell Hall suite 233, 1300 University Blvd, Birmingham, AL 35233

e-mail: [younger@uab.edu](mailto:younger@uab.edu)

| <b>Participant ID</b> | <b>Age</b> | <b>DMARDs</b>                               | <b>Other medications</b>                                                                                                                                                                                                |
|-----------------------|------------|---------------------------------------------|-------------------------------------------------------------------------------------------------------------------------------------------------------------------------------------------------------------------------|
| RA003                 | 30         | hydroxychloroquine, etanercept              | cymbalta, temazepam, diazepam, Mg, vitamin D, tramadol, cysta-Q, D-mannose,                                                                                                                                             |
| RA004                 | 39         | infliximab                                  | solumedrol, acetaminophen-oxycodone, alprazolam, duloxetine                                                                                                                                                             |
| RA006                 | 24         | adalimumab                                  | Diclofenac                                                                                                                                                                                                              |
| RA008                 | 37         | etanercept                                  | nabumetone, acetaminophen-hydrocodone, zolpidem                                                                                                                                                                         |
| RA009                 | 35         | methotrexate, adalimumab                    | meloxicam, docusate, iron supplement, folic acid                                                                                                                                                                        |
| RA012                 | 46         | methotrexate, hydroxychloroquine, abatacept | prednisone, meloxicam, duloxetine, dexlansoprazole, alendronic acid, ranitidine, folic acid, vitamin B2, multivitamin                                                                                                   |
| RA015                 | 37         | tocilizumab, hydroxychloroquine             | acetaminophen-hydrocodone, insulin, levothyroxine, famotidine-ibuprofen, aspirin, vitamin E, calcium, alpha-lipoic acid, CoQ10                                                                                          |
| RA016                 | 57         | methotrexate                                | meloxicam, unspecified antihypertensive                                                                                                                                                                                 |
| RA017                 | 61         | abatacept, methotrexate                     | Pseudoephedrine, methocarbamol, montelukast, verapamil, tramadol, cyclosporine, omeprazole, hydrocodone-acetaminophen, zolpidem, progesterone, vitamin E, vitamin B12, folic acid, vitamin D, calcium, evening primrose |
| RA018                 | 38         | tocilizumab, methotrexate                   | atenolol, folic acid                                                                                                                                                                                                    |
| RA019                 | 39         | methotrexate                                | meloxicam, folic acid                                                                                                                                                                                                   |
| RA020                 | 53         |                                             | prednisone, flavocoxid, quinacrine, amitryptiline, propranolol, lorazepam, vitamin B complex, hydromorphone                                                                                                             |
| RA022                 | 35         | Infliximab, sulfasalazine                   | none                                                                                                                                                                                                                    |

Participants' disease modifying anti-rheumatic drugs (DMARDs) as well as other medications taken regularly while participating in this study.
