# Supplementary material for: No evidence of abnormal metabolic or inflammatory activity in the brains of patients with rheumatoid arthritis: results from a preliminary study using whole-brain magnetic resonance spectroscopic imaging (MRSI)
Source: PubMed Central journal article supplement (PMC7237391; doi:10.1007/s10067-019-04923-5), 2020-01-30
Supplement: 10067_2019_4923_MOESM2_ESM.pdf [file 10067_2019_4923_MOESM2_ESM.pdf]

## **Clinical Rheumatology**

No evidence of abnormal metabolic or inflammatory activity in the brains of patients with rheumatoid arthritis: examination via whole-brain magnetic resonance spectroscopic imaging (MRSI).

Christina Mueller, M.S., Joanne C. Lin, Ph.D., Halle H. Thannickal, Altamish Daredia, B.S., Thomas S. Denney, Ph.D., Ronald Beyers, Ph.D., Jarred W. Younger, Ph.D.

\*Jarred W. Younger (corresponding author)

Department of Psychology, University of Alabama at Birmingham

Campbell Hall suite 233, 1300 University Blvd, Birmingham, AL 35233

e-mail: [younger@uab.edu](mailto:younger@uab.edu)

| NAA/CR            | RA |       |       | Healthy Controls |       |       | t      | df      | p     |
|-------------------|----|-------|-------|------------------|-------|-------|--------|---------|-------|
|                   | N  | Mean  | SD    | N                | Mean  | SD    |        |         |       |
| Precentral R      | 13 | 1.397 | 0.147 | 13               | 1.444 | 0.221 | -0.637 | 24      | 0.530 |
| Precentral L      | 13 | 1.401 | 0.137 | 13               | 1.477 | 0.265 | -0.921 | 24      | 0.366 |
| Frontal R         | 13 | 1.303 | 0.151 | 13               | 1.331 | 0.132 | -0.498 | 24      | 0.623 |
| Frontal L         | 13 | 1.370 | 0.216 | 13               | 1.347 | 0.151 | 0.309  | 24      | 0.760 |
| Rolandic Oper R   | 13 | 1.272 | 0.135 | 13               | 1.230 | 0.100 | 0.914  | 24      | 0.370 |
| Rolandic Oper L   | 13 | 1.267 | 0.144 | 13               | 1.260 | 0.112 | 0.148  | 24      | 0.884 |
| Supp Motor Area R | 12 | 1.219 | 0.155 | 13               | 1.406 | 0.436 | -1.400 | 23      | 0.175 |
| Supp Motor Area L | 13 | 1.295 | 0.141 | 13               | 1.542 | 0.668 | -1.303 | 24      | 0.205 |
| Insula R          | 13 | 1.174 | 0.111 | 13               | 1.143 | 0.110 | 0.711  | 24      | 0.484 |
| Insula L          | 13 | 1.177 | 0.157 | 13               | 1.114 | 0.094 | 1.253  | 24      | 0.222 |
| Cingulum Ant R    | 12 | 1.167 | 0.150 | 13               | 1.135 | 0.194 | 0.458  | 23      | 0.651 |
| Cingulum Ant L    | 13 | 1.200 | 0.185 | 13               | 1.105 | 0.120 | 1.555  | 24      | 0.133 |
| Cingulum Mid R    | 13 | 1.227 | 0.148 | 13               | 1.295 | 0.267 | -0.804 | 24      | 0.429 |
| Cingulum Mid L    | 13 | 1.237 | 0.133 | 13               | 1.266 | 0.165 | -0.482 | 24      | 0.634 |
| Cingulum Post R   | 12 | 1.355 | 0.219 | 13               | 1.343 | 0.137 | 0.171  | 23      | 0.866 |
| Cingulum Post L   | 13 | 1.507 | 0.241 | 13               | 1.484 | 0.121 | 0.305  | 17.651* | 0.764 |
| Hippocampus R     | 13 | 1.109 | 0.305 | 13               | 1.042 | 0.144 | 0.721  | 24      | 0.478 |
| Hippocampus L     | 13 | 1.052 | 0.198 | 13               | 1.009 | 0.124 | 0.663  | 24      | 0.514 |
| Calcarine R       | 13 | 1.323 | 0.144 | 13               | 1.357 | 0.170 | -0.560 | 24      | 0.580 |
| Calcarine L       | 13 | 1.373 | 0.155 | 13               | 1.449 | 0.216 | -1.028 | 24      | 0.314 |
| Cuneus R          | 13 | 1.308 | 0.137 | 13               | 1.397 | 0.159 | -1.523 | 24      | 0.141 |
| Cuneus L          | 13 | 1.382 | 0.165 | 13               | 1.489 | 0.280 | -1.188 | 24      | 0.247 |
| Lingual R         | 13 | 1.231 | 0.182 | 13               | 1.220 | 0.185 | 0.154  | 24      | 0.879 |
| Lingual L         | 13 | 1.291 | 0.154 | 13               | 1.310 | 0.197 | -0.274 | 24      | 0.786 |

|                      |    |       |       |    |       |       |        |    |       |
|----------------------|----|-------|-------|----|-------|-------|--------|----|-------|
| Occipital R          | 13 | 1.290 | 0.135 | 13 | 1.365 | 0.185 | -1.182 | 24 | 0.249 |
| Occipital L          | 13 | 1.401 | 0.187 | 13 | 1.491 | 0.203 | -1.169 | 24 | 0.254 |
| Fusiform R           | 13 | 1.066 | 0.199 | 13 | 1.107 | 0.175 | -0.558 | 24 | 0.582 |
| Fusiform L           | 13 | 1.105 | 0.182 | 13 | 1.111 | 0.166 | -0.086 | 24 | 0.932 |
| Postcentral R        | 13 | 1.366 | 0.137 | 13 | 1.461 | 0.431 | -0.760 | 24 | 0.455 |
| Postcentral L        | 13 | 1.342 | 0.112 | 13 | 1.471 | 0.282 | -1.532 | 24 | 0.139 |
| Parietal R           | 13 | 1.289 | 0.158 | 13 | 1.390 | 0.309 | -1.044 | 24 | 0.307 |
| Parietal L           | 13 | 1.349 | 0.162 | 13 | 1.456 | 0.217 | -1.415 | 24 | 0.170 |
| Precuneus R          | 13 | 1.260 | 0.154 | 13 | 1.356 | 0.363 | -0.876 | 24 | 0.390 |
| Precuneus L          | 13 | 1.328 | 0.154 | 13 | 1.381 | 0.251 | -0.649 | 24 | 0.522 |
| Paracentral Lobule R | 12 | 1.308 | 0.167 | 13 | 1.578 | 0.720 | -1.269 | 23 | 0.217 |
| Paracentral Lobule L | 13 | 1.223 | 0.407 | 13 | 1.486 | 0.410 | -1.638 | 24 | 0.114 |
| Caudate R            | 13 | 1.224 | 0.154 | 13 | 1.190 | 0.122 | 0.625  | 24 | 0.538 |
| Caudate L            | 13 | 1.252 | 0.281 | 13 | 1.170 | 0.150 | 0.926  | 24 | 0.363 |
| Putamen R            | 13 | 1.171 | 0.159 | 13 | 1.133 | 0.105 | 0.700  | 24 | 0.491 |
| Putamen L            | 13 | 1.138 | 0.137 | 13 | 1.070 | 0.087 | 1.521  | 24 | 0.141 |
| Pallidum R           | 13 | 1.264 | 0.246 | 10 | 1.198 | 0.250 | 0.638  | 21 | 0.530 |
| Pallidum L           | 13 | 1.215 | 0.323 | 12 | 0.996 | 0.154 | 2.129  | 23 | 0.044 |
| Thalamus R           | 13 | 1.225 | 0.155 | 13 | 1.188 | 0.159 | 0.597  | 24 | 0.556 |
| Thalamus L           | 13 | 1.222 | 0.178 | 13 | 1.173 | 0.100 | 0.867  | 24 | 0.395 |
| Temporal R           | 13 | 1.191 | 0.121 | 13 | 1.197 | 0.094 | -0.140 | 24 | 0.890 |
| Temporal L           | 13 | 1.241 | 0.124 | 13 | 1.284 | 0.081 | -1.064 | 24 | 0.298 |
| Cerebellum           | 13 | 0.711 | 0.204 | 13 | 0.782 | 0.131 | -1.050 | 24 | 0.304 |

---

| CHO/CR | RA |      |    | Healthy Controls |      |    | t | df | p |
|--------|----|------|----|------------------|------|----|---|----|---|
|        | N  | Mean | SD | N                | Mean | SD |   |    |   |

---

|                   |    |       |       |    |       |       |        |         |       |
|-------------------|----|-------|-------|----|-------|-------|--------|---------|-------|
| Precentral R      | 13 | 0.184 | 0.025 | 13 | 0.183 | 0.022 | 0.080  | 24      | 0.937 |
| Precentral L      | 13 | 0.176 | 0.024 | 13 | 0.173 | 0.019 | 0.263  | 24      | 0.795 |
| Frontal R         | 13 | 0.193 | 0.024 | 13 | 0.191 | 0.021 | 0.273  | 24      | 0.787 |
| Frontal L         | 13 | 0.188 | 0.022 | 13 | 0.188 | 0.019 | 0.033  | 24      | 0.974 |
| Rolandic Oper R   | 13 | 0.195 | 0.027 | 13 | 0.191 | 0.019 | 0.487  | 24      | 0.631 |
| Rolandic Oper L   | 13 | 0.184 | 0.027 | 13 | 0.192 | 0.021 | -0.773 | 24      | 0.447 |
| Supp Motor Area R | 12 | 0.194 | 0.031 | 13 | 0.187 | 0.031 | 0.556  | 23      | 0.583 |
| Supp Motor Area L | 13 | 0.191 | 0.026 | 13 | 0.185 | 0.017 | 0.623  | 24      | 0.539 |
| Insula R          | 13 | 0.219 | 0.028 | 13 | 0.219 | 0.019 | 0.032  | 24      | 0.975 |
| Insula L          | 13 | 0.212 | 0.023 | 13 | 0.211 | 0.019 | 0.053  | 24      | 0.958 |
| Cingulum Ant R    | 12 | 0.214 | 0.029 | 13 | 0.212 | 0.033 | 0.175  | 23      | 0.863 |
| Cingulum Ant L    | 13 | 0.192 | 0.039 | 13 | 0.233 | 0.051 | -2.305 | 24      | 0.030 |
| Cingulum Mid R    | 13 | 0.201 | 0.025 | 13 | 0.195 | 0.031 | 0.567  | 24      | 0.576 |
| Cingulum Mid L    | 13 | 0.204 | 0.029 | 13 | 0.205 | 0.026 | -0.112 | 24      | 0.912 |
| Cingulum Post R   | 12 | 0.199 | 0.033 | 13 | 0.186 | 0.024 | 1.140  | 23      | 0.266 |
| Cingulum Post L   | 13 | 0.213 | 0.036 | 13 | 0.201 | 0.024 | 0.960  | 24      | 0.347 |
| Hippocampus R     | 13 | 0.239 | 0.049 | 13 | 0.236 | 0.026 | 0.197  | 24      | 0.845 |
| Hippocampus L     | 13 | 0.243 | 0.034 | 13 | 0.246 | 0.021 | -0.302 | 20.178* | 0.766 |
| Calcarine R       | 13 | 0.156 | 0.027 | 13 | 0.147 | 0.022 | 0.952  | 24      | 0.350 |
| Calcarine L       | 13 | 0.170 | 0.029 | 13 | 0.161 | 0.027 | 0.856  | 24      | 0.400 |
| Cuneus R          | 13 | 0.143 | 0.022 | 13 | 0.144 | 0.023 | -0.059 | 24      | 0.953 |
| Cuneus L          | 13 | 0.147 | 0.024 | 13 | 0.151 | 0.029 | -0.370 | 24      | 0.715 |
| Lingual R         | 13 | 0.168 | 0.031 | 13 | 0.163 | 0.025 | 0.472  | 24      | 0.641 |
| Lingual L         | 13 | 0.168 | 0.030 | 13 | 0.158 | 0.024 | 0.947  | 24      | 0.353 |
| Occipital R       | 13 | 0.158 | 0.026 | 13 | 0.161 | 0.030 | -0.215 | 24      | 0.831 |
| Occipital L       | 13 | 0.151 | 0.036 | 13 | 0.156 | 0.037 | -0.332 | 24      | 0.742 |

|                      |    |       |       |    |       |       |        |         |       |
|----------------------|----|-------|-------|----|-------|-------|--------|---------|-------|
| Fusiform R           | 13 | 0.183 | 0.040 | 13 | 0.183 | 0.029 | 0.026  | 24      | 0.979 |
| Fusiform L           | 13 | 0.183 | 0.036 | 13 | 0.177 | 0.029 | 0.440  | 24      | 0.664 |
| Postcentral R        | 13 | 0.172 | 0.025 | 13 | 0.167 | 0.025 | 0.526  | 24      | 0.604 |
| Postcentral L        | 13 | 0.164 | 0.033 | 13 | 0.168 | 0.027 | -0.323 | 24      | 0.749 |
| Parietal R           | 13 | 0.168 | 0.026 | 13 | 0.165 | 0.024 | 0.341  | 24      | 0.736 |
| Parietal L           | 13 | 0.157 | 0.034 | 13 | 0.164 | 0.029 | -0.516 | 24      | 0.610 |
| Precuneus R          | 13 | 0.164 | 0.029 | 13 | 0.164 | 0.021 | 0.037  | 24      | 0.971 |
| Precuneus L          | 13 | 0.171 | 0.026 | 13 | 0.168 | 0.025 | 0.283  | 24      | 0.779 |
| Paracentral Lobule R | 12 | 0.180 | 0.034 | 13 | 0.172 | 0.015 | 0.734  | 14.696* | 0.474 |
| Paracentral Lobule L | 13 | 0.177 | 0.034 | 13 | 0.169 | 0.022 | 0.70   | 24      | 0.491 |
| Caudate R            | 13 | 0.233 | 0.044 | 13 | 0.230 | 0.040 | 0.185  | 24      | 0.854 |
| Caudate L            | 13 | 0.241 | 0.046 | 13 | 0.212 | 0.023 | 1.977  | 17.645* | 0.064 |
| Putamen R            | 13 | 0.202 | 0.034 | 13 | 0.194 | 0.032 | 0.620  | 24      | 0.541 |
| Putamen L            | 13 | 0.207 | 0.028 | 13 | 0.200 | 0.023 | 0.670  | 24      | 0.509 |
| Pallidum R           | 13 | 0.183 | 0.045 | 10 | 0.186 | 0.040 | -0.195 | 21      | 0.847 |
| Pallidum L           | 13 | 0.179 | 0.064 | 12 | 0.161 | 0.055 | 0.781  | 23      | 0.443 |
| Thalamus R           | 13 | 0.228 | 0.028 | 13 | 0.217 | 0.044 | 0.759  | 24      | 0.455 |
| Thalamus L           | 13 | 0.224 | 0.029 | 13 | 0.215 | 0.025 | 0.831  | 24      | 0.414 |
| Temporal R           | 13 | 0.183 | 0.028 | 13 | 0.181 | 0.022 | 0.173  | 24      | 0.864 |
| Temporal L           | 13 | 0.175 | 0.031 | 13 | 0.179 | 0.022 | -0.365 | 24      | 0.719 |
| Cerebellum           | 13 | 0.197 | 0.034 | 13 | 0.194 | 0.030 | 0.231  | 24      | 0.819 |

---

| MI/CR        | RA |       |       | Healthy Controls |       |       | t      | df | p     |
|--------------|----|-------|-------|------------------|-------|-------|--------|----|-------|
|              | N  | Mean  | SD    | N                | Mean  | SD    |        |    |       |
| Precentral R | 13 | 0.520 | 0.125 | 13               | 0.535 | 0.197 | -0.244 | 24 | 0.810 |
| Precentral L | 13 | 0.543 | 0.085 | 13               | 0.506 | 0.090 | 1.067  | 24 | 0.297 |

|                   |    |       |       |    |       |       |        |         |       |
|-------------------|----|-------|-------|----|-------|-------|--------|---------|-------|
| Frontal R         | 13 | 0.560 | 0.097 | 13 | 0.513 | 0.110 | 1.168  | 24      | 0.254 |
| Frontal L         | 13 | 0.554 | 0.082 | 13 | 0.562 | 0.116 | -0.184 | 24      | 0.855 |
| Rolandic Oper R   | 13 | 0.542 | 0.103 | 13 | 0.514 | 0.117 | 0.655  | 24      | 0.519 |
| Rolandic Oper L   | 13 | 0.544 | 0.100 | 13 | 0.584 | 0.172 | -0.736 | 24      | 0.469 |
| Supp Motor Area R | 12 | 0.460 | 0.115 | 13 | 0.496 | 0.111 | -0.776 | 23      | 0.446 |
| Supp Motor Area L | 13 | 0.522 | 0.104 | 13 | 0.452 | 0.140 | 1.435  | 24      | 0.164 |
| Insula R          | 13 | 0.550 | 0.144 | 13 | 0.595 | 0.189 | -0.690 | 24      | 0.497 |
| Insula L          | 13 | 0.570 | 0.151 | 13 | 0.593 | 0.105 | -0.449 | 24      | 0.658 |
| Cingulum Ant R    | 12 | 0.537 | 0.188 | 13 | 0.565 | 0.208 | -0.360 | 23      | 0.722 |
| Cingulum Ant L    | 13 | 0.722 | 0.329 | 13 | 0.556 | 0.236 | 1.481  | 24      | 0.152 |
| Cingulum Mid R    | 13 | 0.560 | 0.084 | 13 | 0.570 | 0.100 | -0.296 | 24      | 0.769 |
| Cingulum Mid L    | 13 | 0.665 | 0.208 | 13 | 0.567 | 0.095 | 1.544  | 24      | 0.136 |
| Cingulum Post R   | 12 | 0.581 | 0.114 | 13 | 0.569 | 0.107 | 0.266  | 23      | 0.792 |
| Cingulum Post L   | 13 | 0.618 | 0.105 | 13 | 0.591 | 0.150 | 0.526  | 24      | 0.604 |
| Hippocampus R     | 13 | 0.655 | 0.179 | 13 | 0.633 | 0.142 | 0.337  | 24      | 0.739 |
| Hippocampus L     | 13 | 0.665 | 0.170 | 13 | 0.658 | 0.106 | 0.136  | 24      | 0.893 |
| Calcarine R       | 13 | 0.538 | 0.092 | 13 | 0.520 | 0.090 | 0.502  | 24      | 0.620 |
| Calcarine L       | 13 | 0.564 | 0.083 | 13 | 0.542 | 0.158 | 0.457  | 24      | 0.652 |
| Cuneus R          | 13 | 0.516 | 0.159 | 13 | 0.513 | 0.101 | 0.063  | 24      | 0.950 |
| Cuneus L          | 13 | 0.530 | 0.148 | 13 | 0.578 | 0.063 | -1.088 | 16.176* | 0.293 |
| Lingual R         | 13 | 0.580 | 0.098 | 13 | 0.536 | 0.097 | 1.136  | 24      | 0.267 |
| Lingual L         | 13 | 0.575 | 0.110 | 13 | 0.516 | 0.142 | 1.184  | 24      | 0.248 |
| Occipital R       | 13 | 0.515 | 0.120 | 13 | 0.515 | 0.084 | 0.015  | 24      | 0.988 |
| Occipital L       | 13 | 0.553 | 0.125 | 13 | 0.580 | 0.099 | -0.615 | 24      | 0.544 |
| Fusiform R        | 13 | 0.577 | 0.103 | 13 | 0.522 | 0.096 | 1.417  | 24      | 0.169 |
| Fusiform L        | 13 | 0.549 | 0.136 | 13 | 0.527 | 0.135 | 0.404  | 24      | 0.690 |

|                      |    |       |       |    |       |       |        |    |       |
|----------------------|----|-------|-------|----|-------|-------|--------|----|-------|
| Postcentral R        | 13 | 0.497 | 0.118 | 13 | 0.526 | 0.151 | -0.549 | 24 | 0.588 |
| Postcentral L        | 13 | 0.529 | 0.097 | 13 | 0.496 | 0.075 | 0.969  | 24 | 0.342 |
| Parietal R           | 13 | 0.519 | 0.092 | 13 | 0.516 | 0.101 | 0.091  | 24 | 0.928 |
| Parietal L           | 13 | 0.567 | 0.102 | 13 | 0.562 | 0.104 | 0.130  | 24 | 0.898 |
| Precuneus R          | 13 | 0.521 | 0.089 | 13 | 0.504 | 0.135 | 0.389  | 24 | 0.701 |
| Precuneus L          | 13 | 0.557 | 0.080 | 13 | 0.556 | 0.095 | 0.023  | 24 | 0.982 |
| Paracentral Lobule R | 12 | 0.465 | 0.145 | 13 | 0.464 | 0.140 | 0.014  | 23 | 0.989 |
| Paracentral Lobule L | 13 | 0.524 | 0.185 | 13 | 0.441 | 0.130 | 1.314  | 24 | 0.201 |
| Caudate R            | 13 | 0.584 | 0.172 | 13 | 0.522 | 0.216 | 0.810  | 24 | 0.426 |
| Caudate L            | 13 | 0.622 | 0.139 | 13 | 0.594 | 0.144 | 0.504  | 24 | 0.619 |
| Putamen R            | 13 | 0.456 | 0.201 | 13 | 0.528 | 0.268 | -0.783 | 24 | 0.441 |
| Putamen L            | 13 | 0.492 | 0.172 | 13 | 0.479 | 0.111 | 0.228  | 24 | 0.822 |
| Pallidum R           | 13 | 0.403 | 0.246 | 10 | 0.302 | 0.129 | 1.174  | 21 | 0.254 |
| Pallidum L           | 13 | 0.413 | 0.474 | 12 | 0.396 | 0.228 | 0.114  | 23 | 0.910 |
| Thalamus R           | 13 | 0.652 | 0.256 | 13 | 0.556 | 0.135 | 1.187  | 24 | 0.247 |
| Thalamus L           | 13 | 0.583 | 0.164 | 13 | 0.591 | 0.175 | -0.113 | 24 | 0.911 |
| Temporal R           | 13 | 0.544 | 0.096 | 13 | 0.530 | 0.094 | 0.356  | 24 | 0.725 |
| Temporal L           | 13 | 0.547 | 0.109 | 13 | 0.520 | 0.104 | 0.642  | 24 | 0.527 |
| Cerebellum           | 13 | 0.529 | 0.103 | 13 | 0.475 | 0.090 | 1.423  | 24 | 0.168 |

| LAC/CR       | RA |       |       | Healthy Controls |       |       | t      | df | p     |
|--------------|----|-------|-------|------------------|-------|-------|--------|----|-------|
|              | N  | Mean  | SD    | N                | Mean  | SD    |        |    |       |
| Precentral R | 13 | 0.313 | 0.299 | 13               | 0.181 | 0.181 | 1.358  | 24 | 0.187 |
| Precentral L | 13 | 0.247 | 0.258 | 13               | 0.193 | 0.184 | 0.619  | 24 | 0.542 |
| Frontal R    | 13 | 0.349 | 0.171 | 13               | 0.403 | 0.375 | -0.467 | 24 | 0.645 |
| Frontal L    | 13 | 0.453 | 0.379 | 13               | 0.341 | 0.212 | 0.932  | 24 | 0.361 |

|                   |    |       |       |    |       |       |        |         |       |
|-------------------|----|-------|-------|----|-------|-------|--------|---------|-------|
| Rolandic Oper R   | 13 | 0.116 | 0.099 | 13 | 0.087 | 0.080 | 0.820  | 24      | 0.420 |
| Rolandic Oper L   | 13 | 0.142 | 0.223 | 13 | 0.134 | 0.180 | 0.097  | 24      | 0.923 |
| Supp Motor Area R | 12 | 0.175 | 0.201 | 13 | 0.186 | 0.147 | -0.155 | 23      | 0.879 |
| Supp Motor Area L | 13 | 0.235 | 0.238 | 13 | 0.183 | 0.183 | 0.628  | 24      | 0.536 |
| Insula R          | 13 | 0.251 | 0.281 | 13 | 0.141 | 0.135 | 1.276  | 24      | 0.214 |
| Insula L          | 13 | 0.232 | 0.270 | 13 | 0.166 | 0.153 | 0.768  | 24      | 0.450 |
| Cingulum Ant R    | 12 | 0.228 | 0.167 | 13 | 0.287 | 0.340 | -0.544 | 23      | 0.592 |
| Cingulum Ant L    | 13 | 0.441 | 0.499 | 13 | 0.300 | 0.356 | 0.830  | 24      | 0.414 |
| Cingulum Mid R    | 13 | 0.088 | 0.114 | 13 | 0.132 | 0.175 | -0.748 | 24      | 0.462 |
| Cingulum Mid L    | 13 | 0.202 | 0.317 | 13 | 0.163 | 0.225 | 0.365  | 24      | 0.718 |
| Cingulum Post R   | 12 | 0.114 | 0.160 | 13 | 0.132 | 0.171 | -0.271 | 23      | 0.789 |
| Cingulum Post L   | 13 | 0.087 | 0.120 | 13 | 0.189 | 0.270 | -1.245 | 24      | 0.225 |
| Hippocampus R     | 13 | 0.199 | 0.178 | 13 | 0.114 | 0.061 | 1.632  | 14.774* | 0.124 |
| Hippocampus L     | 13 | 0.132 | 0.156 | 13 | 0.125 | 0.159 | 0.115  | 24      | 0.909 |
| Calcarine R       | 13 | 0.174 | 0.098 | 13 | 0.236 | 0.233 | -0.884 | 16.129* | 0.390 |
| Calcarine L       | 13 | 0.144 | 0.104 | 13 | 0.239 | 0.327 | -1.000 | 24      | 0.327 |
| Cuneus R          | 13 | 0.315 | 0.227 | 13 | 0.313 | 0.218 | 0.023  | 24      | 0.982 |
| Cuneus L          | 13 | 0.254 | 0.203 | 13 | 0.276 | 0.248 | -0.249 | 24      | 0.805 |
| Lingual R         | 13 | 0.163 | 0.154 | 13 | 0.138 | 0.131 | 0.449  | 24      | 0.657 |
| Lingual L         | 13 | 0.136 | 0.090 | 13 | 0.148 | 0.118 | -0.284 | 24      | 0.779 |
| Occipital R       | 13 | 0.386 | 0.215 | 13 | 0.364 | 0.188 | 0.288  | 24      | 0.776 |
| Occipital L       | 13 | 0.321 | 0.178 | 13 | 0.317 | 0.164 | 0.050  | 24      | 0.960 |
| Fusiform R        | 13 | 0.095 | 0.088 | 13 | 0.096 | 0.076 | -0.032 | 24      | 0.975 |
| Fusiform L        | 13 | 0.058 | 0.048 | 13 | 0.101 | 0.162 | -0.909 | 24      | 0.372 |
| Postcentral R     | 13 | 0.255 | 0.190 | 13 | 0.225 | 0.187 | 0.403  | 24      | 0.691 |
| Postcentral L     | 13 | 0.241 | 0.281 | 13 | 0.229 | 0.276 | 0.111  | 24      | 0.912 |



|                      |    |       |       |    |       |       |        |         |       |
|----------------------|----|-------|-------|----|-------|-------|--------|---------|-------|
| Parietal R           | 13 | 0.278 | 0.182 | 13 | 0.251 | 0.194 | 0.368  | 24      | 0.716 |
| Parietal L           | 13 | 0.188 | 0.172 | 13 | 0.228 | 0.181 | -0.572 | 24      | 0.573 |
| Precuneus R          | 13 | 0.170 | 0.122 | 13 | 0.225 | 0.205 | -0.824 | 24      | 0.418 |
| Precuneus L          | 13 | 0.111 | 0.083 | 13 | 0.213 | 0.223 | -1.549 | 15.29*  | 0.142 |
| Paracentral Lobule R | 12 | 0.227 | 0.243 | 13 | 0.236 | 0.167 | -0.111 | 23      | 0.913 |
| Paracentral Lobule L | 13 | 0.233 | 0.197 | 13 | 0.296 | 0.297 | -0.633 | 24      | 0.532 |
| Caudate R            | 13 | 0.345 | 0.281 | 13 | 0.401 | 0.514 | -0.349 | 24      | 0.730 |
| Caudate L            | 13 | 0.195 | 0.176 | 13 | 0.260 | 0.245 | -0.777 | 24      | 0.445 |
| Putamen R            | 13 | 0.247 | 0.212 | 13 | 0.126 | 0.118 | 1.793  | 18.778* | 0.089 |
| Putamen L            | 13 | 0.143 | 0.135 | 13 | 0.188 | 0.199 | -0.668 | 24      | 0.510 |
| Pallidum R           | 13 | 0.210 | 0.225 | 10 | 0.150 | 0.210 | 0.658  | 21      | 0.518 |
| Pallidum L           | 13 | 0.056 | 0.077 | 12 | 0.100 | 0.140 | -0.994 | 23      | 0.331 |
| Thalamus R           | 13 | 0.165 | 0.170 | 13 | 0.133 | 0.118 | 0.558  | 24      | 0.582 |
| Thalamus L           | 13 | 0.109 | 0.101 | 13 | 0.124 | 0.138 | -0.318 | 24      | 0.754 |
| Temporal R           | 13 | 0.207 | 0.124 | 13 | 0.195 | 0.120 | 0.238  | 24      | 0.814 |
| Temporal L           | 13 | 0.154 | 0.119 | 13 | 0.208 | 0.152 | -1.015 | 24      | 0.32  |
| Cerebellum           | 13 | 0.126 | 0.103 | 13 | 0.112 | 0.081 | 0.373  | 24      | 0.712 |

| Temperature     | RA |       |       | Healthy Controls |       |       | t      | df      | p     |
|-----------------|----|-------|-------|------------------|-------|-------|--------|---------|-------|
|                 | N  | Mean  | SD    | N                | Mean  | SD    |        |         |       |
| Precentral R    | 13 | 5.094 | 0.372 | 13               | 5.023 | 0.429 | 0.453  | 24      | 0.654 |
| Precentral L    | 13 | 4.963 | 0.386 | 13               | 5.019 | 0.413 | -0.357 | 24      | 0.724 |
| Frontal R       | 13 | 4.851 | 0.282 | 13               | 4.838 | 0.622 | 0.068  | 16.722* | 0.947 |
| Frontal L       | 13 | 4.970 | 0.227 | 13               | 4.868 | 0.577 | 0.594  | 15.625* | 0.561 |
| Rolandic Oper R | 13 | 4.879 | 0.389 | 13               | 5.019 | 0.502 | -0.796 | 24      | 0.434 |
| Rolandic Oper L | 13 | 4.834 | 0.383 | 13               | 4.930 | 0.456 | -0.584 | 24      | 0.564 |

|                   |    |       |       |    |       |       |        |         |       |
|-------------------|----|-------|-------|----|-------|-------|--------|---------|-------|
| Supp Motor Area R | 12 | 5.118 | 0.314 | 13 | 5.030 | 0.687 | 0.407  | 23      | 0.688 |
| Supp Motor Area L | 13 | 5.178 | 0.383 | 13 | 4.911 | 0.837 | 1.044  | 24      | 0.307 |
| Insula R          | 13 | 4.602 | 0.320 | 13 | 4.647 | 0.650 | -0.220 | 17.484* | 0.828 |
| Insula L          | 13 | 4.766 | 0.363 | 13 | 4.655 | 0.501 | 0.650  | 24      | 0.522 |
| Cingulum Ant R    | 13 | 4.547 | 0.356 | 13 | 4.448 | 0.477 | 0.586  | 23      | 0.563 |
| Cingulum Ant L    | 13 | 4.901 | 0.679 | 13 | 4.349 | 0.972 | 1.679  | 24      | 0.106 |
| Cingulum Mid R    | 13 | 5.255 | 0.365 | 13 | 5.365 | 0.407 | -0.722 | 24      | 0.477 |
| Cingulum Mid L    | 13 | 5.266 | 0.340 | 13 | 5.328 | 0.449 | -0.392 | 24      | 0.699 |
| Cingulum Post R   | 12 | 5.101 | 0.487 | 13 | 5.221 | 0.390 | -0.681 | 23      | 0.503 |
| Cingulum Post L   | 13 | 5.037 | 0.382 | 13 | 5.134 | 0.459 | -0.589 | 24      | 0.562 |
| Hippocampus R     | 13 | 4.380 | 0.701 | 13 | 4.057 | 0.499 | 1.355  | 24      | 0.188 |
| Hippocampus L     | 13 | 4.012 | 0.337 | 13 | 4.178 | 0.455 | -1.060 | 24      | 0.300 |
| Calcarine R       | 13 | 4.763 | 0.427 | 13 | 4.843 | 0.570 | -0.406 | 24      | 0.689 |
| Calcarine L       | 13 | 4.857 | 0.434 | 13 | 4.950 | 0.521 | -0.497 | 24      | 0.624 |
| Cuneus R          | 13 | 4.962 | 0.443 | 13 | 4.983 | 0.675 | -0.094 | 24      | 0.926 |
| Cuneus L          | 13 | 4.869 | 0.456 | 13 | 4.950 | 0.523 | -0.423 | 24      | 0.676 |
| Lingual R         | 13 | 4.874 | 0.340 | 13 | 4.825 | 0.446 | 0.320  | 24      | 0.752 |
| Lingual L         | 13 | 4.732 | 0.345 | 13 | 4.809 | 0.394 | -0.530 | 24      | 0.601 |
| Occipital R       | 13 | 4.732 | 0.449 | 13 | 4.664 | 0.606 | 0.322  | 24      | 0.750 |
| Occipital L       | 13 | 4.690 | 0.448 | 13 | 4.741 | 0.524 | -0.265 | 24      | 0.793 |
| Fusiform R        | 13 | 4.687 | 0.427 | 13 | 4.482 | 0.655 | 0.946  | 24      | 0.354 |
| Fusiform L        | 13 | 4.524 | 0.541 | 13 | 4.660 | 0.641 | -0.587 | 24      | 0.563 |
| Postcentral R     | 13 | 4.967 | 0.384 | 13 | 5.023 | 0.466 | -0.336 | 24      | 0.740 |
| Postcentral L     | 13 | 4.960 | 0.278 | 13 | 5.080 | 0.391 | -0.895 | 24      | 0.380 |
| Parietal R        | 13 | 5.100 | 0.299 | 13 | 5.158 | 0.460 | -0.386 | 24      | 0.703 |
| Parietal L        | 13 | 5.029 | 0.281 | 13 | 5.275 | 0.428 | -1.736 | 24      | 0.095 |

|                      |    |       |       |    |       |       |        |         |       |
|----------------------|----|-------|-------|----|-------|-------|--------|---------|-------|
| Precuneus R          | 13 | 5.268 | 0.346 | 13 | 5.316 | 0.490 | -0.289 | 24      | 0.775 |
| Precuneus L          | 13 | 5.232 | 0.323 | 13 | 5.314 | 0.375 | -0.599 | 24      | 0.555 |
| Paracentral Lobule R | 12 | 4.937 | 0.526 | 13 | 5.110 | 0.646 | -0.728 | 23      | 0.474 |
| Paracentral Lobule L | 13 | 4.713 | 1.278 | 13 | 5.028 | 0.645 | -0.792 | 24      | 0.436 |
| Caudate R            | 13 | 4.989 | 0.408 | 13 | 5.027 | 0.584 | -0.190 | 24      | 0.851 |
| Caudate L            | 13 | 4.864 | 0.461 | 13 | 4.858 | 0.501 | 0.036  | 24      | 0.972 |
| Putamen R            | 13 | 4.214 | 0.529 | 13 | 4.281 | 0.576 | -0.310 | 24      | 0.759 |
| Putamen L            | 13 | 4.211 | 0.648 | 13 | 4.073 | 0.618 | 0.553  | 24      | 0.586 |
| Pallidum R           | 13 | 3.937 | 0.899 | 10 | 3.495 | 0.535 | 1.375  | 21      | 0.184 |
| Pallidum L           | 13 | 3.431 | 0.486 | 12 | 3.641 | 0.853 | -0.766 | 23      | 0.451 |
| Thalamus R           | 13 | 4.526 | 0.351 | 13 | 4.358 | 0.729 | 0.746  | 24      | 0.463 |
| Thalamus L           | 13 | 4.533 | 0.445 | 13 | 4.551 | 0.794 | -0.072 | 24      | 0.944 |
| Temporal R           | 13 | 4.475 | 0.420 | 13 | 4.504 | 0.415 | -0.178 | 24      | 0.860 |
| Temporal L           | 13 | 4.586 | 0.319 | 13 | 4.546 | 0.543 | 0.226  | 24      | 0.823 |
| Cerebellum           | 13 | 4.559 | 0.341 | 13 | 4.641 | 0.561 | -0.454 | 19.805* | 0.655 |

\*degrees of freedom (df) have been adjusted for unequal variances between groups

Mean metabolite ratios and their standard deviations (SD) in the RA and healthy control groups. t- and p-values refer to independent-samples t-tests comparing metabolite ratios between the groups. None of the results survived corrections for multiple comparisons.
