# Supplementary material for: No evidence of abnormal metabolic or inflammatory activity in the brains of patients with rheumatoid arthritis: results from a preliminary study using whole-brain magnetic resonance spectroscopic imaging (MRSI)
Source: PubMed Central journal article supplement (PMC7237391; doi:10.1007/s10067-019-04923-5), 2020-01-30
Supplement: 10067_2019_4923_MOESM3_ESM.pdf [file 10067_2019_4923_MOESM3_ESM.pdf]

## **Clinical Rheumatology**

No evidence of abnormal metabolic or inflammatory activity in the brains of patients with rheumatoid arthritis: examination via whole-brain magnetic resonance spectroscopic imaging (MRSI).

Christina Mueller, M.S., Joanne C. Lin, Ph.D., Halle H. Thannickal, Altamish Daredia, B.S., Thomas S. Denney, Ph.D., Ronald Beyers, Ph.D., Jarred W. Younger, Ph.D.

\*Jarred W. Younger (corresponding author)

Department of Psychology, University of Alabama at Birmingham

Campbell Hall suite 233, 1300 University Blvd, Birmingham, AL 35233

e-mail: [younger@uab.edu](mailto:younger@uab.edu)

| ROI                  | LAC/CR  |               |              | NAA/CR  |               |              | Temperature (°C) |               |              |
|----------------------|---------|---------------|--------------|---------|---------------|--------------|------------------|---------------|--------------|
|                      | FSS VAS | DAS28 swollen | DAS28 tender | FSS VAS | DAS28 swollen | DAS28 tender | FSS VAS          | DAS28 swollen | DAS28 tender |
| Precentral R         | 0.008   | 0.023         | -0.296       | 0.416   | 0.281         | -0.033       | 0.323            | -0.065        | 0.234        |
| Precentral L         | 0.028   | 0.043         | -0.195       | 0.098   | 0.385         | 0.081        | -0.337           | 0.136         | 0.064        |
| Frontal Lobe R       | 0.152   | -0.113        | -0.385       | 0.287   | 0.238         | -0.139       | -0.438           | -0.156        | -0.128       |
| Frontal Lobe L       | 0.048   | -0.094        | -0.209       | 0.250   | 0.456         | -0.020       | -0.275           | -0.054        | -0.006       |
| Rolandic Oper R      | -0.208  | 0.238         | -0.131       | -0.093  | 0.130         | -0.153       | 0.157            | -0.371        | 0.064        |
| Rolandic Oper L      | -0.096  | 0.187         | 0.092        | 0.483   | 0.150         | -0.028       | 0.166            | 0.283         | 0.287        |
| Supp Motor Area R    | 0.128†  | -0.018†       | -0.363†      | 0.292†  | 0.174†        | -0.113†      | 0.217†           | 0.054†        | 0.109†       |
| Supp Motor Area L    | 0.065   | 0.051         | -0.248       | 0.214   | 0.442         | 0.092        | -0.128†          | -0.109†       | 0.116†       |
| Insula R             | -0.118  | -0.099        | -0.195       | 0.219   | 0.329         | 0.000        | -0.396           | -0.326        | -0.198       |
| Insula L             | -0.132  | -0.196        | -0.391       | 0.244   | 0.448         | 0.251        | 0.250            | 0.088         | 0.123        |
| Anterior Cingulum R  | 0.142†  | -0.454†       | -0.589*†     | 0.292†  | 0.047†        | 0.201†       | -0.089†          | -0.011†       | -0.254†      |
| Anterior Cingulum L  | -0.073  | -0.425        | -0.700**     | 0.306   | -0.065        | -0.114       | -0.461           | -0.207        | -0.318       |
| Mid Cingulum R       | 0.084   | -0.235        | -0.198       | 0.124   | 0.281         | -0.039       | 0.050†           | -0.229†       | -0.014†      |
| Mid Cingulum L       | -0.239  | -0.312        | -0.494       | 0.230   | 0.142         | -0.117       | 0.197            | -0.128        | 0.061        |
| Posterior Cingulum R | -0.101† | -0.118†       | -0.203†      | 0.356†  | 0.050†        | 0.118†       | 0.029†           | 0.186†        | 0.285†       |
| Posterior Cingulum L | 0.135   | 0.020         | -0.167       | 0.351   | 0.023         | 0.184        | 0.472            | 0.442         | 0.513        |

|                      |        |        |         |        |        |        |          |         |         |
|----------------------|--------|--------|---------|--------|--------|--------|----------|---------|---------|
| Hippocampus R        | -0.126 | -0.298 | -0.449  | 0.346  | 0.247  | 0.262  | -0.135†  | -0.033† | 0.233†  |
| Hippocampus L        | 0.138  | -0.045 | -0.053  | 0.379  | 0.207  | 0.374  | 0.309    | 0.436   | 0.572*  |
| Calcarine R          | -0.135 | -0.014 | -0.192  | 0.340  | -0.014 | 0.056  | -0.073   | -0.340  | -0.014  |
| Calcarine L          | -0.348 | -0.119 | -0.117  | -0.093 | -0.003 | -0.315 | 0.056    | -0.391  | 0.056   |
| Cuneus R             | -0.402 | -0.068 | -0.304  | 0.396  | 0.266  | 0.086  | 0.129    | -0.402  | -0.028  |
| Cuneus L             | -0.129 | -0.099 | -0.050  | -0.051 | -0.048 | -0.438 | -0.031   | -0.652* | -0.435  |
| Lingual Gyrus R      | -0.199 | -0.303 | -0.427  | 0.582* | 0.218  | 0.416  | 0.045    | -0.105  | 0.315   |
| Lingual Gyrus L      | -0.391 | -0.383 | -0.505  | 0.081  | 0.122  | -0.095 | 0.037    | -0.278  | 0.084   |
| Occipital Lobe R     | -0.126 | -0.176 | -0.145  | 0.028  | 0.320  | 0.067  | 0.253    | 0.048   | 0.008   |
| Occipital Lobe L     | -0.084 | 0.136  | -0.268  | -0.087 | 0.062  | -0.352 | -0.138   | -0.612* | -0.379  |
| Fusiform Gyrus R     | 0.081  | -0.028 | -0.134  | 0.205  | 0.170  | 0.259  | 0.219    | -0.043  | 0.206   |
| Fusiform Gyrus L     | -0.051 | -0.323 | -0.170  | 0.385  | 0.317  | 0.232  | 0.334    | -0.031  | 0.248   |
| Postcentral Gyrus R  | 0.056  | 0.125  | -0.075  | 0.104  | 0.241  | -0.259 | -0.233   | -0.096  | -0.128  |
| Postcentral Gyrus L  | 0.160  | -0.023 | -0.279  | -0.022 | 0.179  | -0.089 | -0.458   | -0.224  | -0.081  |
| Parietal Lobe R      | -0.171 | 0.227  | 0.047   | 0.157  | 0.266  | -0.050 | 0.000    | -0.162  | -0.064  |
| Parietal Lobe L      | 0.104  | 0.230  | 0.120   | 0.056  | 0.105  | -0.273 | -0.112   | -0.470  | -0.131  |
| Precuneus R          | -0.177 | 0.017  | -0.310  | 0.169  | 0.374  | 0.081  | 0.112    | -0.417  | 0.011   |
| Precuneus L          | -0.104 | -0.130 | -0.212  | 0.051  | 0.184  | -0.114 | -0.258   | -0.536  | -0.290  |
| Paracentral Lobule R | 0.064† | 0.084† | -0.261† | 0.470† | 0.436† | 0.113† | -0.037†† | 0.135†† | 0.221†† |

|                      |        |        |        |        |        |        |          |          |          |
|----------------------|--------|--------|--------|--------|--------|--------|----------|----------|----------|
| Paracentral Lobule L | 0.214  | 0.043  | -0.089 | 0.489  | 0.320  | 0.061  | -0.353†† | -0.308†† | -0.133†† |
| Caudate R            | -0.281 | -0.332 | -0.335 | 0.208  | 0.130  | 0.117  | -0.517   | -0.570*  | -0.469   |
| Caudate L            | -0.326 | 0.037  | -0.237 | -0.037 | 0.337  | -0.109 | -0.084   | 0.244    | 0.234    |
| Putamen R            | -0.140 | -0.159 | -0.312 | 0.332  | -0.108 | 0.017  | 0.042    | -0.315   | -0.114   |
| Putamen L            | -0.149 | -0.380 | -0.402 | 0.079  | 0.249  | 0.059  | 0.199    | 0.136    | 0.120    |
| Pallidum R           | 0.121  | -0.051 | -0.318 | 0.098  | -0.326 | -0.114 | -0.278   | -0.164   | -0.293   |
| Pallidum L           | 0.360  | 0.167  | 0.053  | -0.275 | -0.247 | 0.045  | 0.555†   | 0.055†   | 0.377†   |
| Thalamus R           | -0.205 | -0.147 | -0.159 | 0.469  | 0.349  | 0.379  | -0.11    | -0.128   | 0.006    |
| Thalamus L           | -0.020 | 0.150  | 0.151  | 0.129  | 0.30   | 0.170  | 0.107    | 0.153    | 0.234    |
| Temporal Lobe R      | -0.230 | -0.298 | -0.204 | 0.011  | 0.082  | -0.075 | 0.242    | -0.133   | 0.237    |
| Temporal Lobe L      | -0.107 | -0.040 | -0.117 | 0.132  | -0.221 | -0.262 | 0.017    | -0.159   | 0.190    |
| Cerebellum           | -0.045 | 0.020  | -0.229 | -0.177 | 0.150  | 0.036  | -0.112   | -0.255   | 0.159    |

---

VAS: visual analog scale

\*p<0.05 \*\*p<0.01

n=13 (unless an exception is noted); †: n=12; ††: n=11

Spearman correlations between metabolite ratios and temperature in regions of interest and clinical outcome data in RA patients. None of the results survived corrections for multiple comparisons (equivalent to uncorrected p<0.0023).
